# Supplementary material for: Impact of preoperative serum albumin on 30-day mortality following surgery for colorectal cancer: a population-based cohort study
Source: PubMed Central journal article supplement — BMJ Open Gastroenterol. 2015 Aug 4;2(1):e000047. doi: 10.1136/bmjgast-2015-000047 (PMC4599163; doi:10.1136/bmjgast-2015-000047), 2015-08-04
Supplement: bmjgast-2015-000047supp.pdf [file bmjgast-2015-000047supp.pdf]

## Supplementary Appendix

The following codes were used to identify cancer information in the Danish Cancer Registry:

### *Colorectal Cancer:*

- Colon cancer: ICD-8: 153; ICD-10: C18
- Rectal cancer: ICD-8: 154; ICD-10: C19, C20

### *Colorectal cancer stage classification:*

- Localized:
  - Dukes: A,B
  - TNM\*: T1-4,x N0 M0; T1-2 N0 Mx; T1 Nx M0,x
- Regional:
  - Dukes: C
  - TNM\*: T1-4,x N1-3 M0
- Metastasized
  - Dukes: D
  - TNM\*: T1-4,x N0-3,x M1
- Unknown
  - TNM\*: T0,a,is; T2-4,x Nx M0,x; T3-4,x N0 Mx; T1-4,x N1-2 Mx

\* Colorectal cancers were classified according to TNM from 2004 on.

The following codes were used to identify conditions in the Danish National Patient Registry:

- *Colorectal surgery (NOMESCO codes):*
  - Open radical resection: JGB00, JGB10, JGB20, JGB30, JGB40, JGB50, JGB60, JGB96, JFB20, JFB30, JFB 33, JFB40, JFB43, JFB46, JFB50, JFB60, JFB63, JFB96, JFH00, JFH10, JFH20, JFH30, JFH33, JFH40, JFH96, JGA00, JGA70
  - Laparoscopic radical resection: JGB01, JGB11, JGB31, JGB97, JFB21, JFB31, JFB34, JFB41, JFB44, JFB47, JFB51, JFB61, JFB64, JFB97, JFH01, JFH11
  - Non-resectional procedures: JGA32-58, JGA73-98, JGW, JFA68, JFA83-84, JFA96-97, JFC, JFF10-13, JFF20-31, JFW
  
- *Disease included in the adjusted Charlson Comorbidity Index:*
  - Myocardial infarction: ICD-8: 410; ICD-10: I21, I22, I23
  - Congestive heart failure: ICD-8: 427.09, 427.10, 427.11, 427.19, 428.99, 782.49; ICD-10: I50, I11.0, I13.0, I13.2
  - Peripheral vascular disease: ICD-8: 440, 441, 442, 443, 444, 445; ICD-10: I70, I71, I72, I73, I74, I77
  - Cerebrovascular disease: ICD-8: 430-438; ICD-10: I60-I69, G45, G46
  - Dementia: ICD-8: 290.09-290.19, 293.09; ICD-10: F00-F03, F05.1, G30
  - Chronic pulmonary disease: ICD-8: 490-493, 515-518; ICD-10: J40-J47, J60-J67, J68.4, J70.1, J70.3, J84.1, J92.0, J96.1, J98.2, J98.3
  - Connective tissue disease: ICD-8: 712, 716, 734, 446, 135.99; ICD-10: M05, M06, M08, M09, M30, M31, M32, M33, M34, M35, M36, D86
  - Ulcer disease: ICD-8: 530.91, 530.98, 531-534; ICD-10: K22.1, K25-K28

- Mild liver disease: ICD-8: 571, 573.01, 573.04; ICD-10: B18, K70.0-K70.3, K70.9, K71, K73, K74, K76.0
- Uncomplicated type 1 and type 2 diabetes: ICD-8: 249.00, 249.06, 249.07, 249.09, 250.00, 250.06, 250.07, 250.09; ICD-10: E10.0, E10.1, E10.9, E11.0, E11.1, E11.9
- Hemiplegia: ICD-8: 344; ICD-10: G81, G82
- Moderate to severe renal disease: ICD-8: 403, 404, 580-583, 584, 590.09, 593.19, 753.10-753.19, 792; ICD-10: I12, I13, N00-N05, N07, N11, N14, N17-N19, Q61
- Diabetes with end-organ damage: ICD-8: 249.01-249.05, 249.08, 250.01-250.05, 250.08; ICD-10: E10.2-E10.8, E11.2-E11.8
- Any tumor (excluding CRC): ICD-8: 140-194 (excluding 153-154); ICD-10: C00-C75 (excluding C18-C20)
- Leukemia: ICD-8: 204-207; ICD-10: C91-C95
- Lymphoma: ICD-8: 200-203, 275.59; ICD-10: C81-C85, C88, C90, C96
- Moderate to severe liver disease: ICD-8: 070.00, 070.02, 070.04, 070.06, 070.08, 573.00, 456.00-456.09; ICD-10: B15.0, B16.0, B16.2, B19.0, K70.4, K72, K76.6, I85
- Metastatic solid tumor (excluding metastases from CRC): ICD-8: 195-198, 199 (excluding patients with diagnoses 197.59, 197.79); ICD-10: C76-C80 (excluding patients with diagnoses C78.5 and C78.7)
- AIDS: ICD-8: 079.83; ICD-10: B21-B24
- *Non-hepatic alcohol-related disease*: ICD-8: 291-291.9, 303-303.9, 980; ICD-10: F10.2, F10.7, F10.8, I42.6, G62.1, K29.2, G72.1, G31.2, T51, Z72.1

**Supplementary Table S1** Percentages of colorectal cancer (CRC) patients with at least one laboratory measurement of any type coded in the laboratory database by year of CRC surgery and county where CRC surgery was performed. A cut-off of 90% was used to identify the study population (years and counties included in the study are indicated in bold)

| Year of CRC surgery | Percentage of patients with laboratory measurement |              |              |              |
|---------------------|----------------------------------------------------|--------------|--------------|--------------|
|                     | Nordjyllands                                       | Ringkjøbing  | Viborg       | Aarhus       |
| 1996                | 43.5                                               | 2.9          | 6.4          | 76.2         |
| 1997                | <b>97.3</b>                                        | 8.5          | 8.3          | 77.4         |
| 1998                | <b>100.0</b>                                       | 10.5         | 6.7          | 80.7         |
| 1999                | <b>100.0</b>                                       | 5.9          | 10.0         | 81.8         |
| 2000                | <b>100.0</b>                                       | 10.6         | 15.2         | <b>98.2</b>  |
| 2001                | <b>100.0</b>                                       | 6.9          | 15.3         | <b>100.0</b> |
| 2002                | <b>100.0</b>                                       | 13.3         | 14.4         | <b>100.0</b> |
| 2003                | <b>100.0</b>                                       | 19.8         | 16.5         | <b>99.3</b>  |
| 2004                | <b>99.7</b>                                        | 6.5          | 42.1         | <b>99.7</b>  |
| 2005                | <b>100.0</b>                                       | 2.8          | <b>93.3</b>  | <b>99.7</b>  |
| 2006                | <b>100.0</b>                                       | <b>94.0</b>  | <b>96.1</b>  | <b>99.3</b>  |
| 2007                | <b>99.4</b>                                        | <b>100.0</b> | <b>93.7</b>  | <b>99.4</b>  |
| 2008                | <b>99.7</b>                                        | <b>100.0</b> | <b>96.9</b>  | <b>99.4</b>  |
| 2009                | <b>99.7</b>                                        | <b>100.0</b> | <b>100.0</b> | <b>98.8</b>  |
| 2010                | <b>100.0</b>                                       | <b>100.0</b> | <b>92.7</b>  | <b>100.0</b> |
| 2011                | <b>99.7</b>                                        | <b>100.0</b> | <b>97.8</b>  | <b>100.0</b> |

**Supplementary Table S2** Prevalence of individual disease from the Charlson Comorbidity

Index

|                                         | Serum albumin concentration |                      |                        |                        |                      | Missing<br>albumin<br>n = 1,008 |
|-----------------------------------------|-----------------------------|----------------------|------------------------|------------------------|----------------------|---------------------------------|
|                                         | Hypoalbuminemia             |                      |                        | Normal albuminemia     |                      |                                 |
|                                         | Severe                      | Moderate             | Mild                   | Low                    | High                 |                                 |
|                                         | <=25 g/L<br>n = 401         | 26-30 g/L<br>n = 784 | 31-35 g/L<br>n = 1,742 | 36-40 g/L<br>n = 3,065 | >40 g/L<br>n = 3,347 |                                 |
| <b>Myocardial infarction</b>            | 21 (5.2)                    | 50 (6.4)             | 114 (6.5)              | 193 (6.3)              | 190 (5.7)            | 58 (5.8)                        |
| <b>Congestive heart failure</b>         | 29 (7.2)                    | 46 (5.9)             | 119 (6.8)              | 146 (4.8)              | 110 (3.3)            | 50 (5.0)                        |
| <b>Peripheral vascular disease</b>      | 18 (4.5)                    | 47 (6.0)             | 102 (5.9)              | 154 (5.0)              | 115 (3.4)            | 41 (4.1)                        |
| <b>Cerebrovascular disease</b>          | 43 (10.7)                   | 101 (12.9)           | 195 (11.2)             | 307 (10.0)             | 234 (7.0)            | 79 (1.8)                        |
| <b>Dementia</b>                         | 8 (2.0)                     | 10 (1.3)             | 15 (0.9)               | 26 (0.9)               | 12 (0.4)             | 11 (1.1)                        |
| <b>Chronic pulmonary disease</b>        | 37 (9.2)                    | 110 (14.0)           | 191 (11.0)             | 279 (9.1)              | 224 (6.7)            | 68 (6.8)                        |
| <b>Connective tissue disease</b>        | 15 (3.7)                    | 21 (2.7)             | 54 (3.1)               | 88 (2.9)               | 92 (2.8)             | 23 (2.3)                        |
| <b>Ulcer disease</b>                    | 37 (9.2)                    | 57 (7.3)             | 114 (6.5)              | 199 (6.5)              | 155 (4.6)            | 48 (4.8)                        |
| <b>Mild liver disease</b>               | 6 (1.5)                     | 11 (1.4)             | 16 (0.9)               | 20 (0.7)               | 15 (0.5)             | 10 (1.0)                        |
| <b>Diabetes type 1 and 2</b>            | 31 (7.7)                    | 51 (6.5)             | 117 (6.7)              | 209 (6.8)              | 185 (5.5)            | 54 (5.4)                        |
| <b>Hemiplegia</b>                       | 0                           | 1 (0.1)              | 3 (0.2)                | 10 (0.3)               | 6 (0.2)              | 1 (0.1)                         |
| <b>Moderate to severe renal disease</b> | 9 (2.2)                     | 24 (3.1)             | 40 (2.3)               | 58 (1.9)               | 50 (1.5)             | 14 (1.4)                        |
| <b>Diabetes with end-organ damage</b>   | 15 (3.7)                    | 25 (3.2)             | 53 (3.0)               | 83 (2.7)               | 66 (2.0)             | 14 (1.4)                        |
| <b>Any tumor</b>                        | 42 (10.5)                   | 105 (13.4)           | 181 (10.4)             | 286 (9.3)              | 278 (8.3)            | 81 (8.0)                        |
| <b>Leukemia</b>                         | 1 (0.3)                     | 2 (0.3)              | 2 (0.1)                | 9 (0.3)                | 9 (0.3)              | 4 (0.4)                         |
| <b>Lymphoma</b>                         | 4 (1.0)                     | 4 (0.5)              | 12 (0.7)               | 18 (0.6)               | 21 (0.6)             | 2 (0.2)                         |
| <b>Moderate to severe liver disease</b> | 2 (0.5)                     | 2 (0.3)              | 5 (0.3)                | 4 (0.1)                | 5 (0.2)              | 2 (0.2)                         |
| <b>Metastatic solid tumor</b>           | 17 (4.2)                    | 32 (4.1)             | 43 (2.5)               | 55 (1.8)               | 61 (1.8)             | 13 (1.3)                        |
| <b>AIDS</b>                             | 0                           | 0                    | 1 (0.1)                | 0                      | 1 (<0.1)             | 1 (0.1)                         |

in patients undergoing surgery for colorectal cancer in North and Central Denmark, 1997-2012

**Supplementary Table S3** Characteristics of patients undergoing surgery for colorectal cancer surgery with and without preoperative serum albumin measurement

|                           | Patients with albumin measurement<br>n = 9,339 | Patients without albumin measurement |                                                                |                                                                      |
|---------------------------|------------------------------------------------|--------------------------------------|----------------------------------------------------------------|----------------------------------------------------------------------|
|                           |                                                | Overall<br>n = 1,008                 | With other laboratory in the 30 days before surgery<br>n = 490 | Without any laboratory test in the 30 days before surgery<br>n = 518 |
| <b>Gender (%):</b>        |                                                |                                      |                                                                |                                                                      |
| - Male                    | 4,928 (52.8%)                                  | 514 (51.0%)                          | 242 (49.4%)                                                    | 272 (52.5%)                                                          |
| - Female                  | 4,411 (47.2%)                                  | 494 (49.0%)                          | 248 (50.6%)                                                    | 246 (47.4%)                                                          |
| <b>Age (%):</b>           |                                                |                                      |                                                                |                                                                      |
| - <60 yr                  | 1,752 (18.8%)                                  | 210 (20.8%)                          | 107 (21.8%)                                                    | 103 (19.9%)                                                          |
| - 60-69 yr                | 2,556 (27.4%)                                  | 237 (23.5%)                          | 123 (25.1%)                                                    | 114 (22.0%)                                                          |
| - 70-79 yr                | 3,093 (33.1%)                                  | 317 (31.5%)                          | 148 (30.2%)                                                    | 169 (32.6%)                                                          |
| - >=80 yr                 | 1,938 (20.8%)                                  | 244 (24.1%)                          | 112 (22.9%)                                                    | 132 (25.5%)                                                          |
| <b>Type of admission:</b> |                                                |                                      |                                                                |                                                                      |
| - Elective                | 7,260 (77.4%)                                  | 534 (53.5%)                          | 307 (62.7%)                                                    | 227 (43.8%)                                                          |
| - Non-elective            | 2,069 (22.2%)                                  | 465 (46.2%)                          | 178 (36.3%)                                                    | 287 (55.4%)                                                          |
| - Missing                 | 10 (0.1%)                                      | 9 (0.9%)                             | 5 (1.0%)                                                       | 4 (0.8%)                                                             |
| <b>Cancer site:</b>       |                                                |                                      |                                                                |                                                                      |
| - Colon                   | 5,658 (60.6%)                                  | 779 (77.3%)                          | 370 (75.5%)                                                    | 409 (79.0%)                                                          |
| - Rectum                  | 3,681 (39.4%)                                  | 229 (22.%)                           | 120 (24.5%)                                                    | 109 (21.0%)                                                          |
| <b>Cancer stage:</b>      |                                                |                                      |                                                                |                                                                      |
| - Localized               | 3,850 (41.2%)                                  | 385 (38.2%)                          | 193 (39.4%)                                                    | 192 (37.1%)                                                          |
| - Regional                | 2,655 (28.4%)                                  | 299 (29.7%)                          | 148 (30.2%)                                                    | 151 (29.2%)                                                          |
| - Metastasized            | 1,566 (16.8%)                                  | 206 (20.4%)                          | 91 (18.6%)                                                     | 115 (22.2%)                                                          |
| - Unknown                 | 1,268 (13.6%)                                  | 118 (11.7%)                          | 58 (11.8%)                                                     | 60 (11.6%)                                                           |
| <b>Type of surgery:</b>   |                                                |                                      |                                                                |                                                                      |
| - Open radical resection  | 7,230 (77.4%)                                  | 721 (71.5%)                          | 344 (70.2%)                                                    | 377 (72.8%)                                                          |

|                                  |               |             |            |            |
|----------------------------------|---------------|-------------|------------|------------|
| - Laparoscopic radical resection | 888 (9.5%)    | 121 (12.0%) | 76 (15.5%) | 45 (8.7%)  |
| - Non-eradictive procedures      | 1,221 (13.1%) | 166 (16.5%) | 70 (14.3%) | 96 (18.5%) |

**Comorbidity:**

|            |               |             |             |             |
|------------|---------------|-------------|-------------|-------------|
| - Low      | 5,438 (58.2%) | 656 (65.1%) | 326 (66.5%) | 330 (63.7%) |
| - Moderate | 2,881 (30.9%) | 268 (26.6%) | 125 (25.5%) | 143 (27.6%) |
| - High     | 1,020 (10.9%) | 84 (8.3%)   | 39 (8.0%)   | 45 (8.7%)   |

**Alcohol-related disease:**

|       |               |             |             |             |
|-------|---------------|-------------|-------------|-------------|
| - No  | 9,164 (98.1%) | 988 (98.0%) | 484 (98.8%) | 504 (97.3%) |
| - Yes | 175 (1.9%)    | 20 (2.0%)   | 6 (1.2%)    | 14 (2.7%)   |

**Marital status:**

|                 |               |             |             |             |
|-----------------|---------------|-------------|-------------|-------------|
| - Married       | 5,256 (56.3%) | 516 (51.2%) | 259 (52.9%) | 257 (49.6%) |
| - Never Married | 664 (7.1%)    | 82 (8.1%)   | 40 (8.2%)   | 42 (8.1%)   |
| - Other         | 3,419 (36.6%) | 410 (40.7%) | 191 (39.0%) | 219 (42.3%) |

---
